# Supplementary material for: Evolution of Divergent Life History Strategies in Marine Alphaproteobacteria
Source: PubMed Central journal article supplement — mBio. 2013 Jul 9;4(4):e00373-13. doi: 10.1128/mBio.00373-13 (PMC3735120; doi:10.1128/mbio.00373-13), 2013-07-09
Supplement: mbo004131559st1.pdf [file mbo004131559st1.pdf]

Table S1.

(A). Gene number (predicted for ancestral nodes), and predicted number of gene families gained, lost, expanded, and contracted in the Roseobacter and SAR11 clade genomes. The ancestral reconstruction is based on an alphaproteobacterial tree estimated using the NDCH model in P4. Note that the gain of a gene family or expansion of an existing gene family could be a result of either lateral gene transfer or gene duplication. The relative contribution of these two mechanisms is presented in Fig. 3.

| Node                                        | Gene # | Gain | Loss | Expansion | Contraction |
|---------------------------------------------|--------|------|------|-----------|-------------|
| <i>Phaeobacter gallaeciensis</i> BS107      | 4220   | 294  | 135  | 48        | 8           |
| <i>Jannaschia</i> sp. CCS1                  | 4369   | 491  | 4332 | 84        | 194         |
| <i>Dinoroseobacter shibae</i> DFL 12        | 3743   | 281  | 4900 | 50        | 197         |
| <i>Ruegeria pomeroyi</i> DSS-3              | 3954   | 211  | 2072 | 60        | 100         |
| <i>Sulfitobacter</i> sp. EE36               | 3680   | 161  | 301  | 28        | 15          |
| <i>Roseobacter</i> sp. GAI101               | 4325   | 452  | 1025 | 108       | 63          |
| <i>Oceanibulbus indolifex</i> HEL-45        | 4245   | 501  | 1329 | 108       | 69          |
| Rhodobacteraceae bacterium<br>HTCC2083      | 4281   | 687  | 4512 | 77        | 202         |
| Rhodobacterales bacterium HTCC2255          | 2327   | 165  | 5556 | 47        | 110         |
| <i>Roseovarius nubinhibens</i> ISM          | 3662   | 278  | 1963 | 69        | 90          |
| Rhodobacteraceae bacterium KLH11            | 4332   | 715  | 572  | 101       | 23          |
| <i>Roseobacter</i> sp. MED193               | 4675   | 543  | 631  | 112       | 67          |
| <i>Sulfitobacter</i> sp. NAS-14.1           | 4019   | 284  | 123  | 112       | 4           |
| <i>Octadecabacter arcticus</i> 238          | 4730   | 1039 | 602  | 247       | 11          |
| <i>Octadecabacter antarcticus</i> 307       | 5011   | 1197 | 509  | 221       | 6           |
| <i>Oceanicola batsensis</i> HTCC2597        | 4297   | 519  | 3957 | 105       | 194         |
| <i>Roseobacter denitrificans</i> OCh114     | 4148   | 288  | 527  | 43        | 37          |
| <i>Roseobacter litoralis</i> OCh149         | 4872   | 553  | 149  | 88        | 3           |
| <i>Oceanicola granulosus</i> HTCC2516       | 3857   | 427  | 4434 | 111       | 170         |
| <i>Phaeobacter gallaeciensis</i> 2.10       | 4154   | 245  | 145  | 25        | 6           |
| <i>Ruegeria</i> sp. R11                     | 3858   | 291  | 531  | 39        | 32          |
| <i>Pelagibaca bermudensis</i> HTCC2601      | 5448   | 872  | 694  | 171       | 61          |
| <i>Roseobacter</i> sp. R2A57                | 4522   | 944  | 4440 | 98        | 177         |
| <i>Thalassiosibium</i> sp. R2A62            | 3818   | 591  | 1514 | 78        | 79          |
| <i>Roseobacter</i> sp. AzwK-3b              | 4143   | 591  | 1512 | 113       | 78          |
| Rhodobacterales bacterium HTCC2150          | 3770   | 489  | 5133 | 72        | 203         |
| <i>Maritimibacter alkaliphilus</i> HTCC2654 | 4792   | 865  | 4330 | 140       | 189         |
| <i>Roseobacter</i> sp. CCS2                 | 3849   | 440  | 542  | 58        | 27          |
| <i>Roseovarius</i> sp. 217                  | 4822   | 545  | 263  | 136       | 4           |
| <i>Roseobacter</i> sp. SK209-2-6            | 4646   | 573  | 687  | 83        | 33          |

---

|                                           |      |     |      |     |     |
|-------------------------------------------|------|-----|------|-----|-----|
| <i>Citreicella</i> sp. SE45               | 5488 | 876 | 662  | 147 | 57  |
| <i>Loktanella</i> sp. SE62                | 4757 | 867 | 898  | 105 | 56  |
| <i>Loktanella vestfoldensis</i> SKA53     | 3191 | 249 | 936  | 68  | 39  |
| <i>Ruegeria lacuscaerulensis</i> ITI-1157 | 3847 | 383 | 671  | 30  | 48  |
| <i>Sagittula stellata</i> E-37            | 5100 | 686 | 1346 | 131 | 121 |
| <i>Roseovarius</i> sp. TM1035             | 4269 | 369 | 579  | 74  | 36  |
| <i>Ruegeria</i> sp. TM1040                | 3187 | 192 | 1051 | 30  | 42  |
| <i>Ruegeria</i> sp. TrichCH4B             | 4922 | 820 | 137  | 96  | 3   |
| <i>Phaeobacter</i> sp. Y4I                | 4284 | 394 | 1990 | 55  | 130 |
| R1                                        | 4041 | 125 | 204  | 13  | 13  |
| R2                                        | 4128 | 24  | 1319 | 2   | 83  |
| R3                                        | 4769 | 21  | 454  | 0   | 13  |
| R4                                        | 5810 | 0   | 42   | 0   | 2   |
| R5                                        | 4154 | 59  | 1733 | 0   | 119 |
| R6                                        | 6065 | 0   | 0    | 0   | 0   |
| R7                                        | 6075 | 60  | 426  | 6   | 9   |
| R8                                        | 4168 | 22  | 680  | 0   | 33  |
| R9                                        | 6013 | 6   | 141  | 0   | 3   |
| R10                                       | 6589 | 20  | 1589 | 13  | 49  |
| R11                                       | 3838 | 63  | 1060 | 4   | 54  |
| R12                                       | 4961 | 13  | 129  | 0   | 0   |
| R13                                       | 5173 | 24  | 2802 | 8   | 112 |
| R14                                       | 4417 | 153 | 3853 | 29  | 252 |
| R15                                       | 8596 | 5   | 0    | 0   | 0   |
| R16                                       | 8584 | 0   | 0    | 0   | 0   |
| R17                                       | 8644 | 3   | 0    | 2   | 0   |
| R18                                       | 5248 | 122 | 630  | 21  | 22  |
| R19                                       | 5840 | 73  | 2326 | 13  | 73  |
| R20                                       | 8689 | 0   | 0    | 0   | 0   |
| R21                                       | 4502 | 123 | 516  | 25  | 35  |
| R22                                       | 5159 | 0   | 119  | 0   | 1   |
| R23                                       | 5469 | 24  | 284  | 1   | 10  |
| R24                                       | 8134 | 3   | 1    | 4   | 0   |
| R25                                       | 8454 | 0   | 2    | 0   | 1   |
| R26                                       | 8689 | 32  | 76   | 3   | 2   |
| R27                                       | 4237 | 122 | 539  | 0   | 24  |
| R28                                       | 4766 | 5   | 478  | 0   | 5   |
| R29                                       | 3915 | 0   | 323  | 1   | 5   |
| R30                                       | 4760 | 67  | 922  | 1   | 8   |
| R31                                       | 7391 | 0   | 3    | 1   | 0   |
| R32                                       | 8341 | 19  | 155  | 0   | 9   |
| R33                                       | 8957 | 5   | 0    | 0   | 0   |
| R34                                       | 8680 | 0   | 1    | 0   | 0   |

---

|                                                   |      |     |      |    |    |
|---------------------------------------------------|------|-----|------|----|----|
| R35                                               | 8935 | 0   | 0    | 0  | 0  |
| R36                                               | 8935 | 0   | 24   | 0  | 1  |
| R37                                               | 8986 | 292 | 2    | 1  | 0  |
| R38                                               | 8374 | 127 | 1179 | 30 | 44 |
| alpha proteobacterium HIMB5                       | 1588 | 198 | 300  | 18 | 8  |
| alpha proteobacterium HIMB114                     | 1353 | 73  | 137  | 12 | 5  |
| Alphaproteobacterium HIMB59                       | 1625 | 247 | 647  | 20 | 20 |
| <i>Candidatus</i> Pelagibacter ubique<br>HTCC1002 | 1441 | 49  | 44   | 5  | 0  |
| <i>Candidatus</i> Pelagibacter ubique<br>HTCC1062 | 1408 | 16  | 40   | 4  | 1  |
| <i>Candidatus</i> Pelagibacter sp. HTCC7211       | 1489 | 95  | 285  | 22 | 5  |
| <i>Candidatus</i> Pelagibacter sp. IMCC9063       | 1498 | 219 | 154  | 15 | 1  |
| S52                                               | 1425 | 0   | 465  | 2  | 8  |
| S53                                               | 1435 | 45  | 297  | 1  | 6  |
| S54                                               | 1703 | 0   | 3    | 0  | 0  |
| S55                                               | 1712 | 1   | 209  | 0  | 1  |
| S56                                               | 1953 | 172 | 284  | 0  | 4  |
| S57                                               | 2045 | 35  | 210  | 5  | 2  |

(B) Gene number (predicted for ancestral nodes), and predicted number of gene families gained, lost, expanded, and contracted in the Roseobacter and SAR11 clade genomes. The ancestral reconstruction is based on an alphaproteobacterial tree estimated using RAXML. Note that the gain of a gene family or expansion of an existing gene family could be a result of either lateral gene transfer or gene duplication. The relative contribution of these two mechanisms is presented in Fig. S3.

| Node                                        | Gene # | Gain | Loss | Expansion | Contraction |
|---------------------------------------------|--------|------|------|-----------|-------------|
| <i>Phaeobacter gallaeciensis</i> BS107      | 4220   | 280  | 137  | 49        | 8           |
| <i>Jannaschia</i> sp. CCS1                  | 4369   | 519  | 3047 | 93        | 88          |
| <i>Dinoroseobacter shibae</i> DFL 12        | 3743   | 287  | 3371 | 67        | 106         |
| <i>Ruegeria pomeroyi</i> DSS-3              | 3954   | 210  | 2070 | 62        | 91          |
| <i>Sulfitobacter</i> sp. EE36               | 3680   | 161  | 300  | 29        | 15          |
| <i>Roseobacter</i> sp. GAI101               | 4325   | 456  | 1019 | 109       | 65          |
| <i>Oceanibulbus indolifex</i> HEL-45        | 4245   | 499  | 1324 | 112       | 66          |
| Rhodobacteraceae bacterium HTCC2083         | 4281   | 688  | 4552 | 80        | 184         |
| Rhodobacterales bacterium HTCC2255          | 2327   | 166  | 5364 | 48        | 103         |
| <i>Roseovarius nubinhibens</i> ISM          | 3662   | 279  | 1867 | 71        | 79          |
| Rhodobacteraceae bacterium KLH11            | 4332   | 719  | 569  | 103       | 23          |
| <i>Roseobacter</i> sp. MED193               | 4675   | 546  | 630  | 113       | 67          |
| <i>Sulfitobacter</i> sp. NAS-14.1           | 4019   | 285  | 123  | 112       | 3           |
| <i>Octadecabacter arcticus</i> 238          | 4730   | 1043 | 595  | 251       | 11          |
| <i>Octadecabacter antarcticus</i> 307       | 5011   | 1204 | 505  | 223       | 5           |
| <i>Oceanicola batsensis</i> HTCC2597        | 4297   | 525  | 1103 | 85        | 89          |
| <i>Roseobacter denitrificans</i> OCh114     | 4148   | 288  | 529  | 42        | 37          |
| <i>Roseobacter litoralis</i> Och149         | 4872   | 551  | 149  | 87        | 4           |
| <i>Oceanicola granulosus</i> HTCC2516       | 3857   | 445  | 3472 | 120       | 124         |
| <i>Phaeobacter gallaeciensis</i> 2.10       | 4154   | 243  | 159  | 25        | 5           |
| <i>Ruegeria</i> sp. R11                     | 3858   | 287  | 536  | 39        | 32          |
| <i>Pelagibaca bermudensis</i> HTCC2601      | 5448   | 876  | 690  | 171       | 57          |
| <i>Roseobacter</i> sp. R2A57                | 4522   | 940  | 4729 | 96        | 184         |
| <i>Thalassiosibium</i> sp. R2A62            | 3818   | 595  | 1439 | 77        | 70          |
| <i>Roseobacter</i> sp. AzwK-3b              | 4143   | 590  | 1486 | 115       | 73          |
| Rhodobacterales bacterium HTCC2150          | 3770   | 492  | 5003 | 75        | 176         |
| <i>Maritimibacter alkaliphilus</i> HTCC2654 | 4792   | 924  | 1062 | 114       | 93          |
| <i>Roseobacter</i> sp. CCS2                 | 3849   | 442  | 523  | 59        | 26          |
| <i>Roseovarius</i> sp. 217                  | 4822   | 547  | 263  | 138       | 4           |
| <i>Roseobacter</i> sp. SK209-2-6            | 4646   | 573  | 683  | 85        | 35          |
| <i>Citricella</i> sp. SE45                  | 5488   | 880  | 658  | 153       | 56          |
| <i>Loktanella</i> sp. SE62                  | 4757   | 871  | 895  | 103       | 49          |
| <i>Loktanella vestfoldensis</i> SKA53       | 3191   | 254  | 920  | 68        | 39          |

|                                           |      |     |      |     |     |
|-------------------------------------------|------|-----|------|-----|-----|
| <i>Ruegeria lacuscaerulensis</i> ITI-1157 | 3847 | 385 | 666  | 31  | 47  |
| <i>Sagittula stellata</i> E-37            | 5100 | 694 | 1351 | 140 | 119 |
| <i>Roseovarius</i> sp. TM1035             | 4269 | 369 | 577  | 74  | 34  |
| <i>Ruegeria</i> sp. TM1040                | 3187 | 193 | 1046 | 26  | 43  |
| <i>Ruegeria</i> sp. TrichCH4B             | 4922 | 825 | 136  | 93  | 4   |
| <i>Phaeobacter</i> sp. Y4I                | 4284 | 394 | 1988 | 58  | 123 |
| R1                                        | 4059 | 125 | 206  | 12  | 14  |
| R2                                        | 4138 | 23  | 1661 | 2   | 101 |
| R3                                        | 4761 | 21  | 772  | 0   | 19  |
| R4                                        | 4147 | 62  | 1678 | 1   | 109 |
| R5                                        | 5988 | 0   | 0    | 0   | 0   |
| R6                                        | 6038 | 0   | 17   | 0   | 1   |
| R7                                        | 6076 | 67  | 435  | 7   | 8   |
| R8                                        | 4162 | 22  | 682  | 0   | 34  |
| R9                                        | 6024 | 6   | 131  | 0   | 3   |
| R10                                       | 6581 | 16  | 1582 | 12  | 45  |
| R11                                       | 4419 | 153 | 3890 | 29  | 224 |
| R12                                       | 3836 | 64  | 1053 | 4   | 51  |
| R13                                       | 4951 | 13  | 128  | 0   | 0   |
| R14                                       | 5170 | 24  | 2774 | 7   | 105 |
| R15                                       | 8635 | 5   | 0    | 0   | 0   |
| R16                                       | 8625 | 0   | 0    | 2   | 0   |
| R17                                       | 8718 | 3   | 0    | 1   | 0   |
| R18                                       | 4499 | 129 | 511  | 27  | 34  |
| R19                                       | 5127 | 0   | 123  | 0   | 2   |
| R20                                       | 5405 | 25  | 1786 | 3   | 22  |
| R21                                       | 5236 | 126 | 624  | 21  | 21  |
| R22                                       | 5817 | 75  | 532  | 10  | 2   |
| R23                                       | 4863 | 0   | 1139 | 14  | 14  |
| R24                                       | 7077 | 2   | 178  | 0   | 9   |
| R25                                       | 8582 | 1   | 7    | 2   | 1   |
| R26                                       | 8778 | 1   | 0    | 0   | 0   |
| R27                                       | 8773 | 37  | 37   | 9   | 1   |
| R28                                       | 3898 | 0   | 338  | 1   | 6   |
| R29                                       | 4749 | 67  | 636  | 1   | 7   |
| R30                                       | 7189 | 0   | 1    | 0   | 0   |
| R31                                       | 4225 | 127 | 513  | 0   | 21  |
| R32                                       | 4689 | 5   | 1161 | 0   | 6   |
| R33                                       | 7984 | 18  | 194  | 2   | 8   |
| R34                                       | 8799 | 1   | 0    | 0   | 0   |
| R35                                       | 7170 | 5   | 51   | 0   | 0   |
| R36                                       | 8793 | 0   | 18   | 0   | 1   |

---

|                                      |      |     |      |    |    |
|--------------------------------------|------|-----|------|----|----|
| R37                                  | 8838 | 301 | 2    | 0  | 0  |
| R38                                  | 8153 | 132 | 1115 | 57 | 32 |
| alpha proteobacterium HIMB5          | 1588 | 205 | 287  | 18 | 10 |
| alpha proteobacterium HIMB114        | 1353 | 74  | 128  | 13 | 5  |
| alpha proteobacterium HIMB59         | 1625 | 253 | 565  | 16 | 23 |
| Candidatus Pelagibacter ubique       | 1441 | 51  | 41   | 5  | 1  |
| Candidatus Pelagibacter ubique       | 1408 | 19  | 38   | 3  | 1  |
| Candidatus Pelagibacter sp. HTCC7211 | 1489 | 102 | 272  | 20 | 6  |
| Candidatus Pelagibacter sp. IMCC9063 | 1498 | 228 | 153  | 15 | 0  |
| S52                                  | 1680 | 0   | 3    | 0  | 0  |
| S53                                  | 1429 | 50  | 283  | 0  | 6  |
| S54                                  | 1688 | 1   | 174  | 0  | 2  |
| S55                                  | 1414 | 0   | 441  | 2  | 10 |
| S56                                  | 1912 | 186 | 255  | 0  | 0  |
| S57                                  | 1954 | 38  | 104  | 49 | 1  |

---

(C) Gene number (predicted for ancestral nodes), and predicted number of gene families gained, lost, expanded, and contracted in the Roseobacter and SAR11 clade genomes. The ancestral reconstruction is based on an alphaproteobacterial tree estimated using the CAT model in PhyloBayes. Note that the gain of a gene family or expansion of an existing gene family could be a result of either lateral gene transfer or gene duplication. The relative contribution of these two mechanisms is presented in Fig. S3.

| Node                                    | Gene # | Gain | Loss | Expansion | Contraction |
|-----------------------------------------|--------|------|------|-----------|-------------|
| <i>Phaeobacter gallaeciensis</i> BS107  | 4220   | 294  | 134  | 49        | 5           |
| <i>Jannaschia</i> sp. CCS1              | 4369   | 524  | 4328 | 93        | 174         |
| <i>Dinoroseobacter shibae</i> DFL 12    | 3743   | 289  | 4650 | 54        | 151         |
| <i>Ruegeria pomeroyi</i> DSS-3          | 3954   | 215  | 2027 | 65        | 86          |
| <i>Sulfitobacter</i> sp. EE36           | 3680   | 164  | 298  | 29        | 16          |
| <i>Roseobacter</i> sp. GAI101           | 4325   | 460  | 998  | 109       | 60          |
| <i>Oceanibulbus indolifex</i> HEL-45    | 4245   | 506  | 1311 | 112       | 64          |
| Rhodobacteraceae bacterium              | 4281   | 690  | 4547 | 77        | 179         |
| Rhodobacterales bacterium               | 2327   | 169  | 5208 | 48        | 91          |
| <i>Roseovarius nubinhibens</i> ISM      | 3662   | 283  | 1838 | 72        | 82          |
| Rhodobacteraceae bacterium KLH11        | 4332   | 731  | 566  | 102       | 22          |
| <i>Roseobacter</i> sp. MED193           | 4675   | 554  | 612  | 113       | 64          |
| <i>Sulfitobacter</i> sp. NAS-14.1       | 4019   | 287  | 120  | 111       | 3           |
| <i>Octadecabacter arcticus</i> 238      | 4730   | 1050 | 589  | 248       | 10          |
| <i>Octadecabacter antarcticus</i> 307   | 5011   | 1210 | 498  | 223       | 6           |
| <i>Oceanicola batsensis</i> HTCC2597    | 4297   | 530  | 1009 | 83        | 60          |
| <i>Roseobacter denitrificans</i> OCh114 | 4148   | 290  | 524  | 42        | 35          |
| <i>Roseobacter litoralis</i> Och149     | 4872   | 556  | 147  | 89        | 4           |
| <i>Oceanicola granulosus</i> HTCC2516   | 3857   | 463  | 3439 | 120       | 112         |
| <i>Phaeobacter gallaeciensis</i> 2.10   | 4154   | 246  | 145  | 28        | 5           |
| <i>Ruegeria</i> sp. R11                 | 3858   | 291  | 529  | 39        | 31          |
| <i>Pelagibaca bermudensis</i> HTCC2601  | 5448   | 887  | 685  | 173       | 55          |
| <i>Roseobacter</i> sp. R2A57            | 4522   | 953  | 4391 | 97        | 171         |
| <i>Thalassibium</i> sp. R2A62           | 3818   | 599  | 1410 | 79        | 66          |
| <i>Roseobacter</i> sp. AzwK-3b          | 4143   | 598  | 1455 | 115       | 71          |
| Rhodobacterales bacterium               | 3770   | 500  | 4882 | 78        | 165         |
| <i>Maritimibacter alkaliphilus</i>      | 4792   | 925  | 964  | 116       | 68          |
| <i>Roseobacter</i> sp. CCS2             | 3849   | 445  | 514  | 62        | 24          |
| <i>Roseovarius</i> sp. 217              | 4822   | 554  | 263  | 138       | 4           |
| <i>Roseobacter</i> sp. SK209-2-6        | 4646   | 589  | 673  | 87        | 33          |
| <i>Citricella</i> sp. SE45              | 5488   | 885  | 647  | 155       | 52          |
| <i>Loktanella</i> sp. SE62              | 4757   | 881  | 883  | 108       | 45          |
| <i>Loktanella vestfoldensis</i> SKA53   | 3191   | 255  | 909  | 68        | 35          |

|                                           |      |     |      |     |     |
|-------------------------------------------|------|-----|------|-----|-----|
| <i>Ruegeria lacuscaerulensis</i> ITI-1157 | 3847 | 388 | 654  | 31  | 44  |
| <i>Sagittula stellata</i> E-37            | 5100 | 702 | 1312 | 144 | 109 |
| <i>Roseovarius</i> sp. TM1035             | 4269 | 369 | 570  | 74  | 34  |
| <i>Ruegeria</i> sp. TM1040                | 3187 | 197 | 1034 | 27  | 42  |
| <i>Ruegeria</i> sp. TrichCH4B             | 4922 | 837 | 132  | 96  | 4   |
| <i>Phaeobacter</i> sp. Y4I                | 4284 | 396 | 1929 | 58  | 114 |
| R1                                        | 4040 | 127 | 202  | 12  | 14  |
| R2                                        | 4126 | 23  | 1616 | 2   | 100 |
| R3                                        | 4732 | 21  | 724  | 0   | 18  |
| R4                                        | 4129 | 62  | 1633 | 1   | 109 |
| R5                                        | 5923 | 0   | 0    | 0   | 0   |
| R6                                        | 5953 | 0   | 20   | 0   | 1   |
| R7                                        | 6005 | 71  | 411  | 10  | 11  |
| R8                                        | 4144 | 22  | 680  | 0   | 38  |
| R9                                        | 5966 | 6   | 104  | 0   | 3   |
| R10                                       | 6491 | 20  | 1366 | 10  | 37  |
| R11                                       | 3831 | 68  | 1036 | 4   | 50  |
| R12                                       | 4921 | 13  | 138  | 0   | 0   |
| R13                                       | 5145 | 23  | 2675 | 6   | 100 |
| R14                                       | 4412 | 158 | 3748 | 30  | 216 |
| R15                                       | 8461 | 5   | 0    | 0   | 0   |
| R16                                       | 8457 | 3   | 16   | 0   | 1   |
| R17                                       | 8614 | 0   | 0    | 0   | 0   |
| R18                                       | 4494 | 133 | 496  | 27  | 33  |
| R19                                       | 5078 | 0   | 131  | 0   | 4   |
| R20                                       | 5374 | 26  | 1705 | 3   | 22  |
| R21                                       | 5217 | 127 | 617  | 20  | 22  |
| R22                                       | 5783 | 76  | 1866 | 11  | 37  |
| R23                                       | 8361 | 0   | 0    | 0   | 0   |
| R24                                       | 4788 | 0   | 2527 | 14  | 54  |
| R25                                       | 8384 | 0   | 0    | 0   | 0   |
| R26                                       | 8418 | 2   | 40   | 0   | 1   |
| R27                                       | 8614 | 33  | 38   | 24  | 0   |
| R28                                       | 4210 | 128 | 500  | 0   | 18  |
| R29                                       | 4655 | 5   | 1165 | 0   | 6   |
| R30                                       | 3885 | 0   | 362  | 1   | 6   |
| R31                                       | 4727 | 69  | 650  | 1   | 5   |
| R32                                       | 7130 | 0   | 1    | 0   | 0   |
| R33                                       | 7874 | 20  | 188  | 2   | 8   |
| R34                                       | 8649 | 3   | 0    | 0   | 0   |
| R35                                       | 8635 | 0   | 0    | 0   | 0   |
| R36                                       | 8634 | 0   | 18   | 0   | 1   |



---

|                                |      |     |      |    |    |
|--------------------------------|------|-----|------|----|----|
| R37                            | 8688 | 278 | 3    | 1  | 0  |
| R38                            | 7976 | 136 | 1039 | 24 | 17 |
| alpha proteobacterium HIMB5    | 1588 | 213 | 281  | 18 | 8  |
| alpha proteobacterium HIMB114  | 1353 | 76  | 126  | 12 | 5  |
| alpha proteobacterium HIMB59   | 1625 | 268 | 542  | 23 | 11 |
| Candidatus Pelagibacter ubique | 1441 | 53  | 41   | 5  | 0  |
| Candidatus Pelagibacter ubique | 1408 | 19  | 36   | 4  | 1  |
| Candidatus Pelagibacter sp.    | 1489 | 105 | 261  | 22 | 5  |
| Candidatus Pelagibacter sp.    | 1498 | 230 | 151  | 15 | 1  |
| S49                            | 1409 | 0   | 432  | 2  | 8  |
| S50                            | 1427 | 50  | 270  | 0  | 6  |
| S51                            | 1665 | 0   | 4    | 0  | 0  |
| S52                            | 1676 | 1   | 171  | 0  | 2  |
| S53                            | 1902 | 190 | 245  | 0  | 1  |
| S54                            | 1928 | 39  | 4285 | 8  | 45 |

---
