# Supplementary material for: Evolution of Divergent Life History Strategies in Marine Alphaproteobacteria
Source: PubMed Central journal article supplement — mBio. 2013 Jul 9;4(4):e00373-13. doi: 10.1128/mBio.00373-13 (PMC3735120; doi:10.1128/mbio.00373-13), 2013-07-09
Supplement: mbo004131559st2.pdf [file mbo004131559st2.pdf]

**Table S2.** Statistical analyses of LGT rates for Roseobacter branches. A) Analysis of covariance results of F-tests for ancestral compared to exterior branches. B) Deleted-t residuals analysis from regressions of gene loss rate, LGT rate, and gene duplication rate vs. amino acid substitution rate, conducted separately for ancestral and exterior branches.

**A.**

| Phylogenetic method | Factor                         | Dependent variable |         |              |
|---------------------|--------------------------------|--------------------|---------|--------------|
| P4                  | a.a. replacements <sup>1</sup> | LGT                | Losses  | Duplications |
|                     | branch category <sup>2</sup>   | 0.002              | < 0.001 | N.S.         |
|                     | interaction                    | < 0.001            | N.S.    | < 0.001      |
| RAxML               | a.a. replacements <sup>1</sup> | N.S.               | N.S.    | N.S.         |
|                     | branch category <sup>2</sup>   | 0.003              | < 0.001 | N.S.         |
|                     | interaction                    | < 0.001            | N.S.    | < 0.001      |
| PhyloBayes          | a.a. replacements <sup>1</sup> | N.S.               | N.S.    | N.S.         |
|                     | branch category <sup>2</sup>   | 0.004              | < 0.001 | N.S.         |
|                     | interaction                    | < 0.001            | N.S.    | < 0.001      |

<sup>1</sup>Covariate

<sup>2</sup>Branches were categorized as ancestral or leaf.

N.S.: Not Significant

**B.**

| Phylogenetic method | Branch category | Dependent variable  | Branch       | Deleted-t residual |
|---------------------|-----------------|---------------------|--------------|--------------------|
| P4                  | ancestral       | <b>LGT</b>          | <b>R37</b>   | <b>12.84***</b>    |
|                     | leaf            | Losses              | CCS1         | -3.54*             |
|                     |                 | <b>Duplications</b> | <b>OA238</b> | <b>7.77***</b>     |
| RAxML               | ancestral       | <b>LGT</b>          | <b>R37</b>   | <b>13.56***</b>    |
|                     | leaf            | Duplications        | R33          | 5.28***            |
|                     |                 | <b>Duplications</b> | <b>OA238</b> | <b>7.60***</b>     |
| PhyloBayes          | ancestral       | <b>LGT</b>          | <b>R37</b>   | <b>13.79***</b>    |
|                     | leaf            | Duplications        | R24          | 5.50***            |
|                     |                 | <b>Duplications</b> | <b>OA238</b> | <b>7.50***</b>     |

<sup>1</sup>Significance levels were corrected for multiple testing by the Bonferroni method: \* P < 0.05; \*\*\* P < 0.001. Boldface indicates patterns consistent across phylogenetic methods.
