# Supplementary material for: Evolution of Divergent Life History Strategies in Marine Alphaproteobacteria
Source: PubMed Central journal article supplement — mBio. 2013 Jul 9;4(4):e00373-13. doi: 10.1128/mBio.00373-13 (PMC3735120; doi:10.1128/mbio.00373-13), 2013-07-09
Supplement: mbo004131559st3.pdf [file mbo004131559st3.pdf]

Table S3: Gene count estimate and confidence intervals of ancestral Roseobacter and SAR11 nodes for three ancestral reconstructions of the alphaproteobacterial tree.

| P4   |                       |                 | RAxML |                       |                 | PhyloBayes |                       |                 |
|------|-----------------------|-----------------|-------|-----------------------|-----------------|------------|-----------------------|-----------------|
| Node | Estimate <sup>a</sup> | CI <sup>b</sup> | Node  | Estimate <sup>a</sup> | CI <sup>b</sup> | Node       | Estimate <sup>a</sup> | CI <sup>b</sup> |
| R1   | 4041                  | 3904-4219       | R1    | 4059                  | 3914-4234       | R1         | 4040                  | 3907-4215       |
| R2   | 4128                  | 3976-4296       | R2    | 4138                  | 3991-4307       | R2         | 4126                  | 3982-4293       |
| R3   | 4769                  | 4566-4942       | R3    | 4761                  | 4558-4934       | R3         | 4732                  | 4543-4912       |
| R4   | 5810                  | 5395-6125       | R4    | 4147                  | 3968-4321       | R4         | 4129                  | 3965-4324       |
| R5   | 4154                  | 4024-4332       | R5    | 5988                  | 5780-6246       | R5         | 5923                  | 5743-6167       |
| R6   | 6065                  | 5870-6258       | R6    | 6038                  | 5820-6246       | R6         | 5953                  | 5789-6167       |
| R7   | 6075                  | 5877-6268       | R7    | 6076                  | 5868-6279       | R7         | 6005                  | 5835-6222       |
| R8   | 4168                  | 3999-4319       | R8    | 4162                  | 3990-4317       | R8         | 4144                  | 3977-4302       |
| R9   | 6013                  | 5377-6508       | R9    | 6024                  | 5385-6476       | R9         | 5966                  | 5326-6422       |
| R10  | 6589                  | 6390-6785       | R10   | 6581                  | 6370-6779       | R10        | 6491                  | 6314-6750       |
| R11  | 3838                  | 3703-4018       | R11   | 4419                  | 4288-4568       | R11        | 3831                  | 3704-4012       |
| R12  | 4961                  | 4543-5201       | R12   | 3836                  | 3704-4017       | R12        | 4921                  | 4526-5179       |
| R13  | 5173                  | 4996-5347       | R13   | 4951                  | 4553-5178       | R13        | 5145                  | 4996-5334       |
| R14  | 4417                  | 4281-4562       | R14   | 5170                  | 5009-5342       | R14        | 4412                  | 4280-4560       |
| R15  | 8596                  | 8333-8895       | R15   | 8635                  | 8334-8989       | R15        | 8461                  | 8216-8851       |
| R16  | 8584                  | 8332-8885       | R16   | 8625                  | 8364-9009       | R16        | 8457                  | 8268-8835       |
| R17  | 8644                  | 8383-8935       | R17   | 8718                  | 8427-9077       | R17        | 8614                  | 8379-8987       |
| R18  | 5248                  | 5111-5412       | R18   | 4499                  | 4354-4709       | R18        | 4494                  | 4354-4697       |
| R19  | 5840                  | 5645-6024       | R19   | 5127                  | 4800-5499       | R19        | 5078                  | 4787-5467       |
| R20  | 8689                  | 8387-9049       | R20   | 5405                  | 5243-5613       | R20        | 5374                  | 5230-5562       |
| R21  | 4502                  | 4366-4711       | R21   | 5236                  | 5087-5404       | R21        | 5217                  | 5075-5391       |
| R22  | 5159                  | 4806-5510       | R22   | 5817                  | 5609-6250       | R22        | 5783                  | 5599-6006       |
| R23  | 5469                  | 5264-5932       | R23   | 4863                  | 4685-5647       | R23        | 8361                  | 8123-8783       |
| R24  | 8134                  | 7825-8485       | R24   | 7077                  | 6573-7557       | R24        | 4788                  | 4642-4994       |
| R25  | 8454                  | 8054-8900       | R25   | 8582                  | 8317-8980       | R25        | 8384                  | 8140-8800       |
| R26  | 8689                  | 8387-9051       | R26   | 8778                  | 8465-9092       | R26        | 8418                  | 8191-8800       |
| R27  | 4237                  | 4112-4390       | R27   | 8773                  | 8467-9092       | R27        | 8614                  | 8398-8987       |
| R28  | 4766                  | 4605-5622       | R28   | 3898                  | 3718-4453       | R28        | 4210                  | 4067-4355       |
| R29  | 3915                  | 3725-4477       | R29   | 4749                  | 4603-4990       | R29        | 4655                  | 4442-5450       |
| R30  | 4760                  | 4611-4961       | R30   | 7189                  | 6221-7813       | R30        | 3885                  | 3705-4431       |
| R31  | 7391                  | 6142-8170       | R31   | 4225                  | 4074-4372       | R31        | 4727                  | 4575-4947       |
| R32  | 8341                  | 7963-8699       | R32   | 4689                  | 4461-5530       | R32        | 7130                  | 6239-7883       |
| R33  | 8957                  | 8630-9256       | R33   | 7984                  | 7381-8320       | R33        | 7874                  | 7342-8292       |
| R34  | 8680                  | 8289-9030       | R34   | 8799                  | 8503-9109       | R34        | 8649                  | 8386-9015       |
| R35  | 8935                  | 8669-9237       | R35   | 7170                  | 4895-8120       | R35        | 8635                  | 8359-9020       |
| R36  | 8935                  | 8669-9222       | R36   | 8793                  | 8491-9109       | R36        | 8634                  | 8352-9020       |
| R37  | 8986                  | 8712-9267       | R37   | 8838                  | 8529-9167       | R37        | 8688                  | 8392-9059       |
| R38  | 8374                  | 8025-8685       | R38   | 8153                  | 7780-8484       | R38        | 7976                  | 7655-8405       |
| S52  | 1425                  | 1335-1545       | S52   | 1680                  | 1567-1790       | S49        | 1409                  | 1314-1531       |

---

|     |      |           |     |      |           |     |      |           |
|-----|------|-----------|-----|------|-----------|-----|------|-----------|
| S53 | 1435 | 1346-1562 | S53 | 1429 | 1342-1562 | S50 | 1427 | 1336-1562 |
| S54 | 1703 | 1602-1794 | S54 | 1688 | 1581-1802 | S51 | 1665 | 1560-1787 |
| S55 | 1712 | 1615-1806 | S55 | 1414 | 1315-1533 | S52 | 1676 | 1571-1799 |
| S56 | 1953 | 1775-2078 | S56 | 1912 | 1739-2046 | S53 | 1902 | 1732-2029 |
| S57 | 2045 | 1937-2136 | S57 | 1954 | 1859-2093 | S54 | 1928 | 1819-2039 |

---

<sup>a</sup> posterior mean number of genes present at the node.

<sup>b</sup> confidence interval with smallest and largest posterior mean in 100 bootstrap samples.
