# Supplementary figures and images for: Evolution of Divergent Life History Strategies in Marine Alphaproteobacteria
Source: PubMed Central journal article supplement — mBio. 2013 Jul 9;4(4):e00373-13. doi: 10.1128/mBio.00373-13 (PMC3735120; doi:10.1128/mbio.00373-13), 2013-07-09

Figure S1

(A)

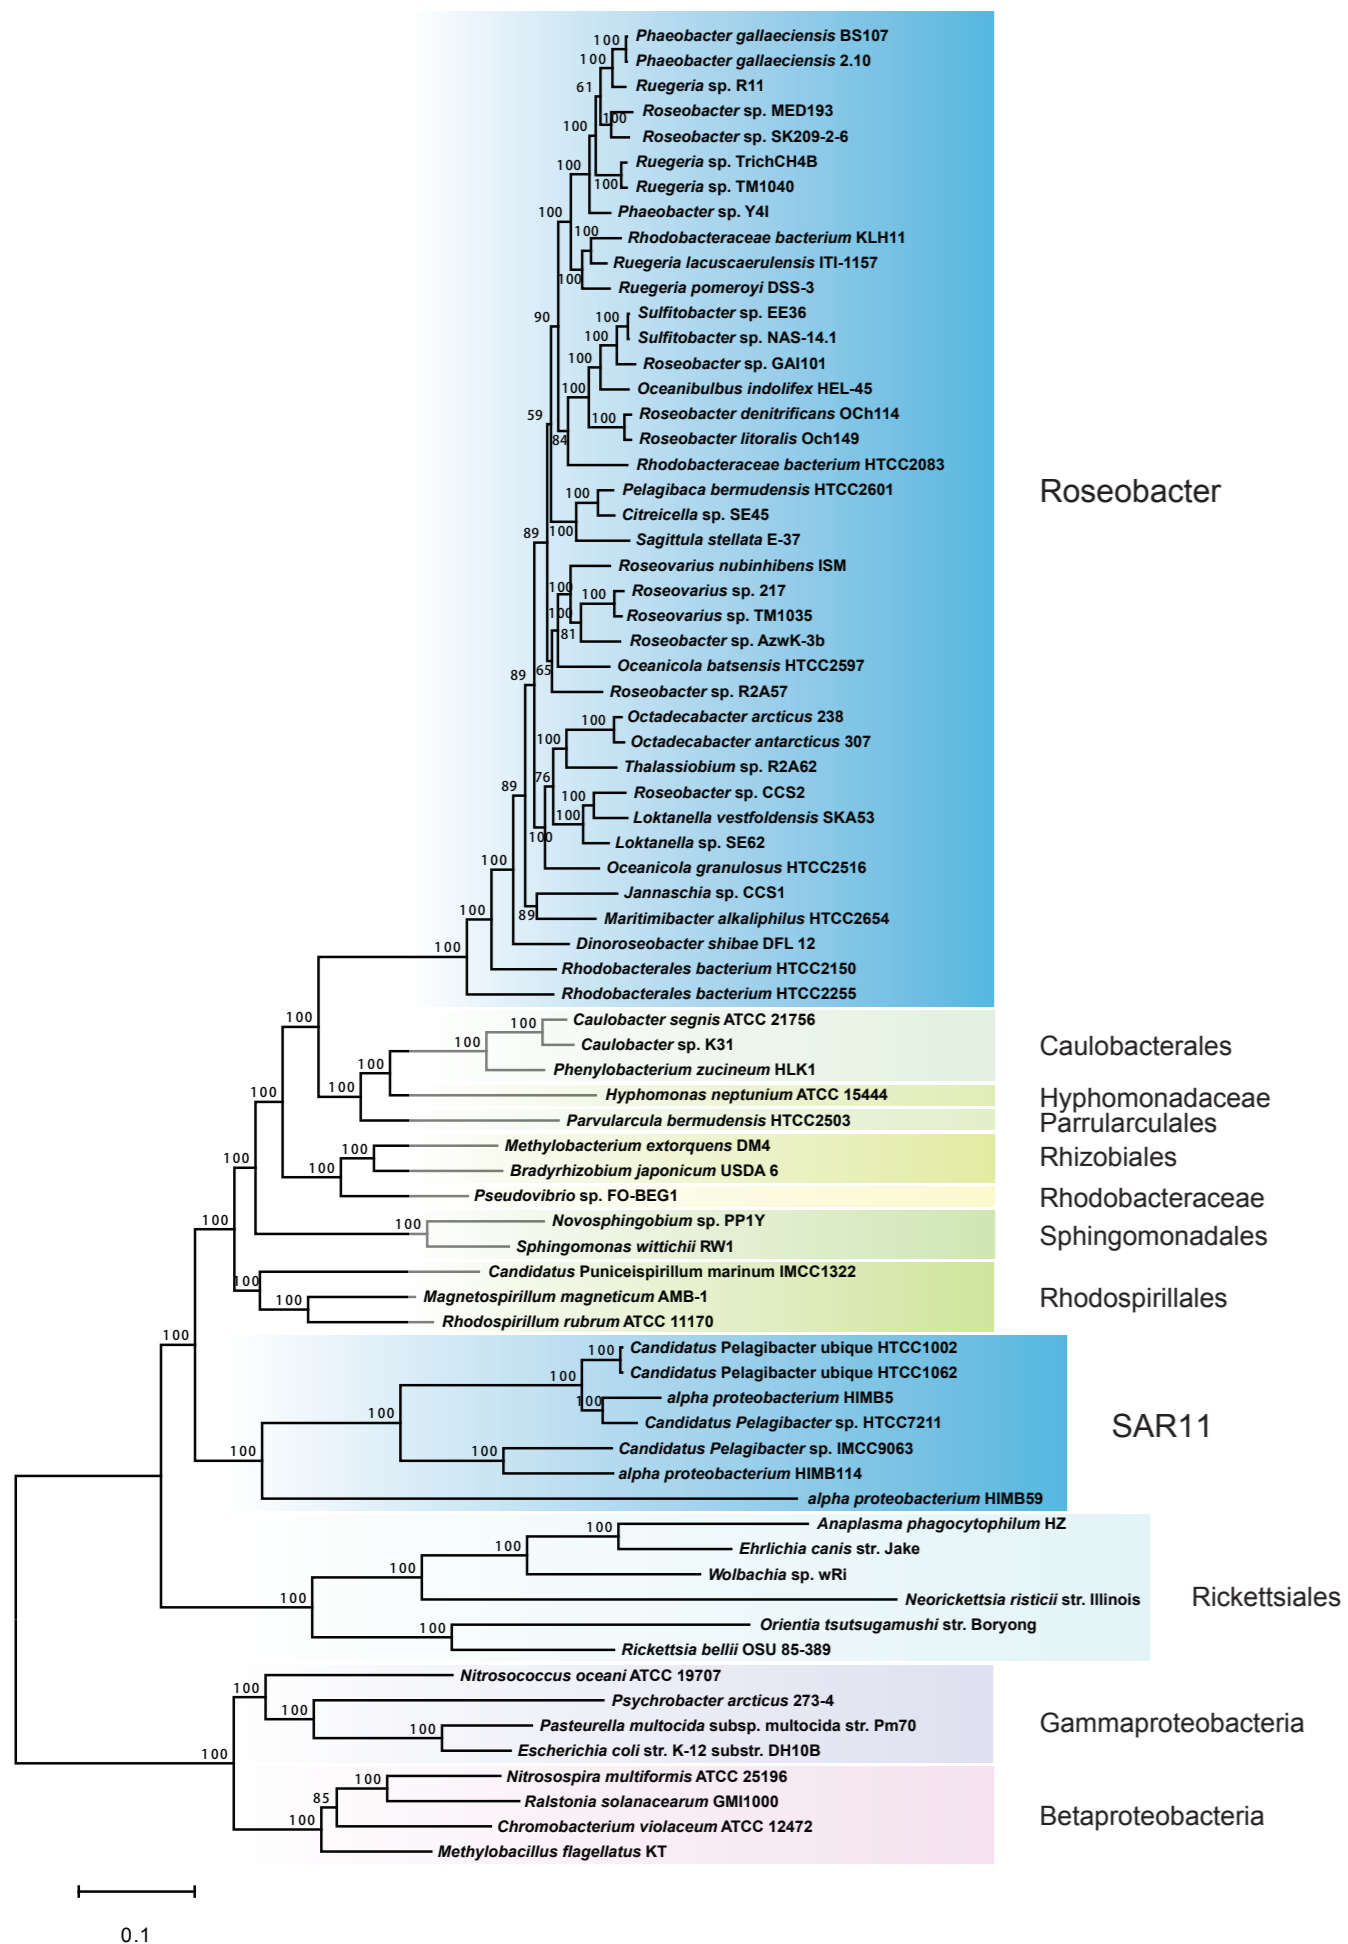

(B)

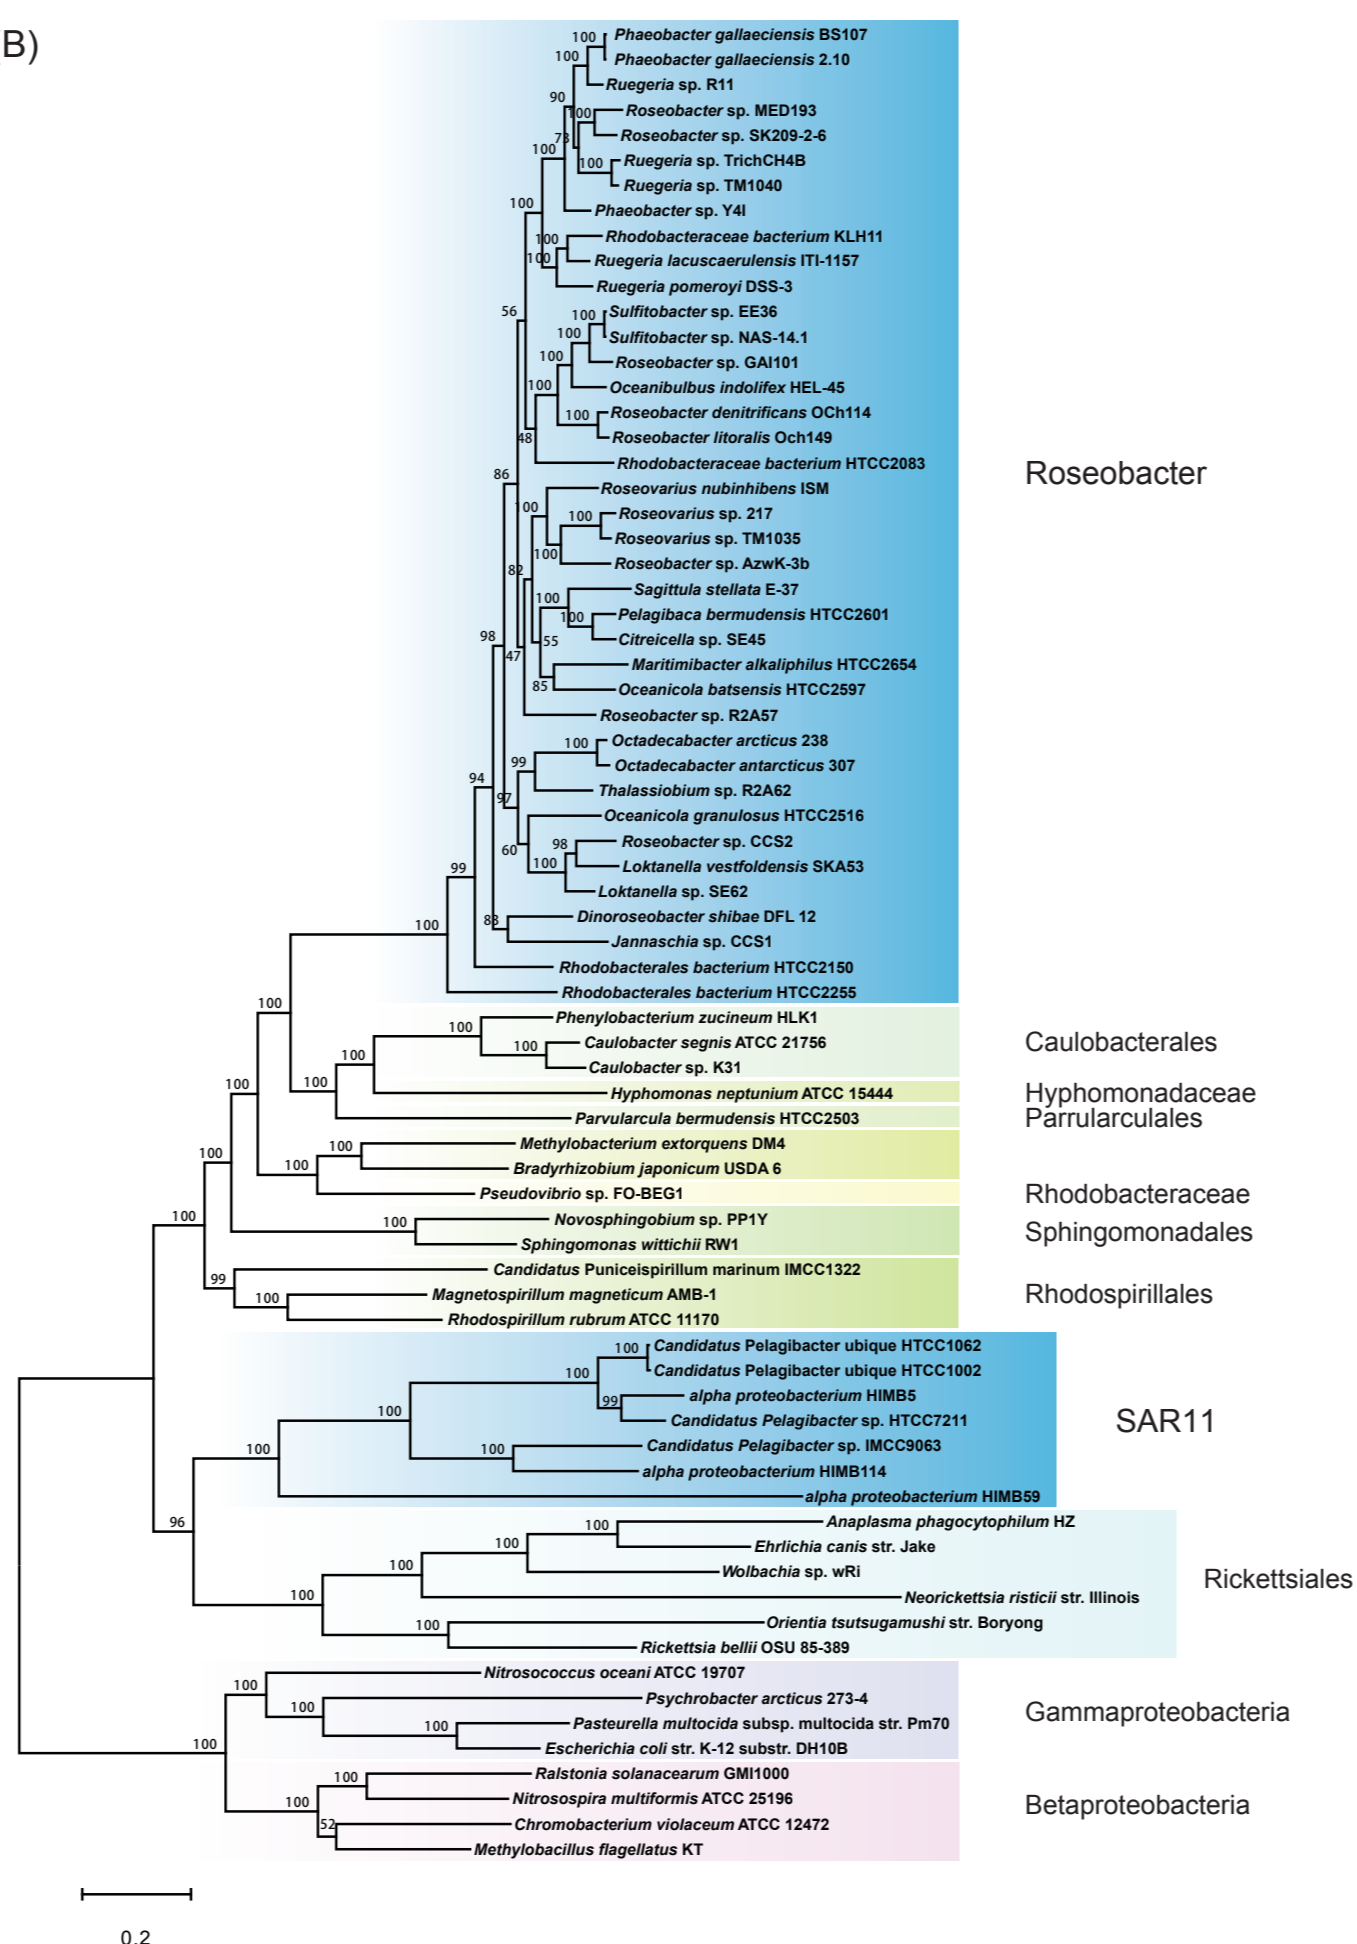

(C)

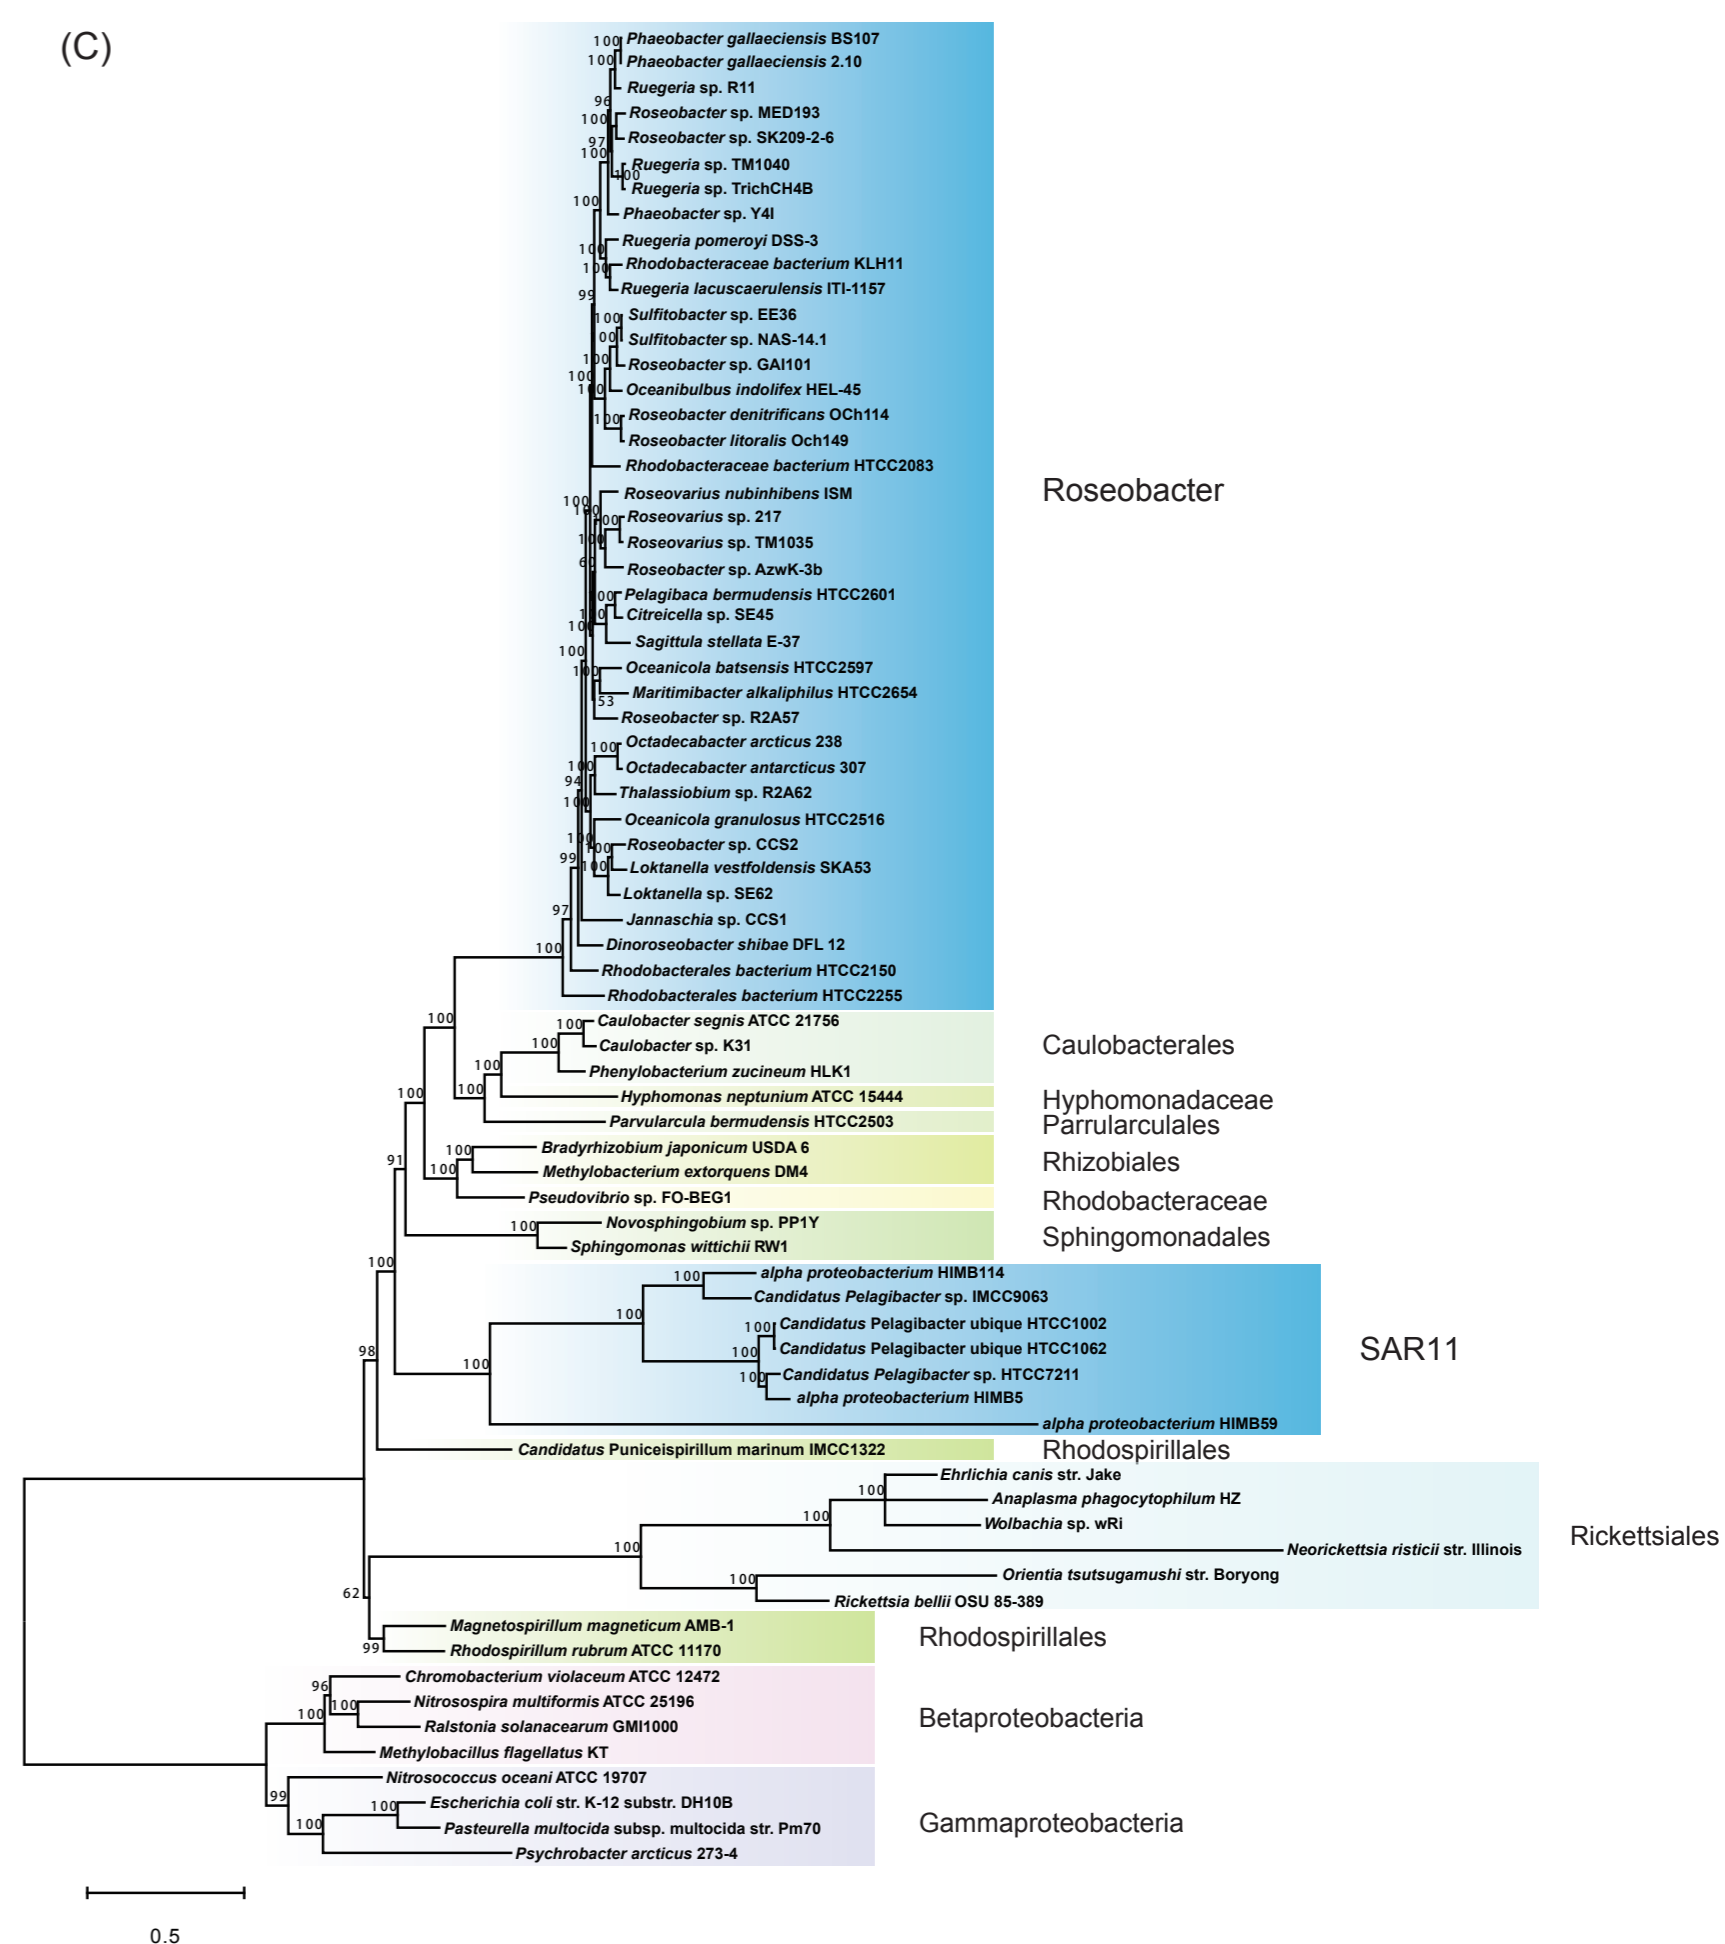

Supplement: mbo004131559sf01.pdf [file mbo004131559sf01.pdf]

Figure S2

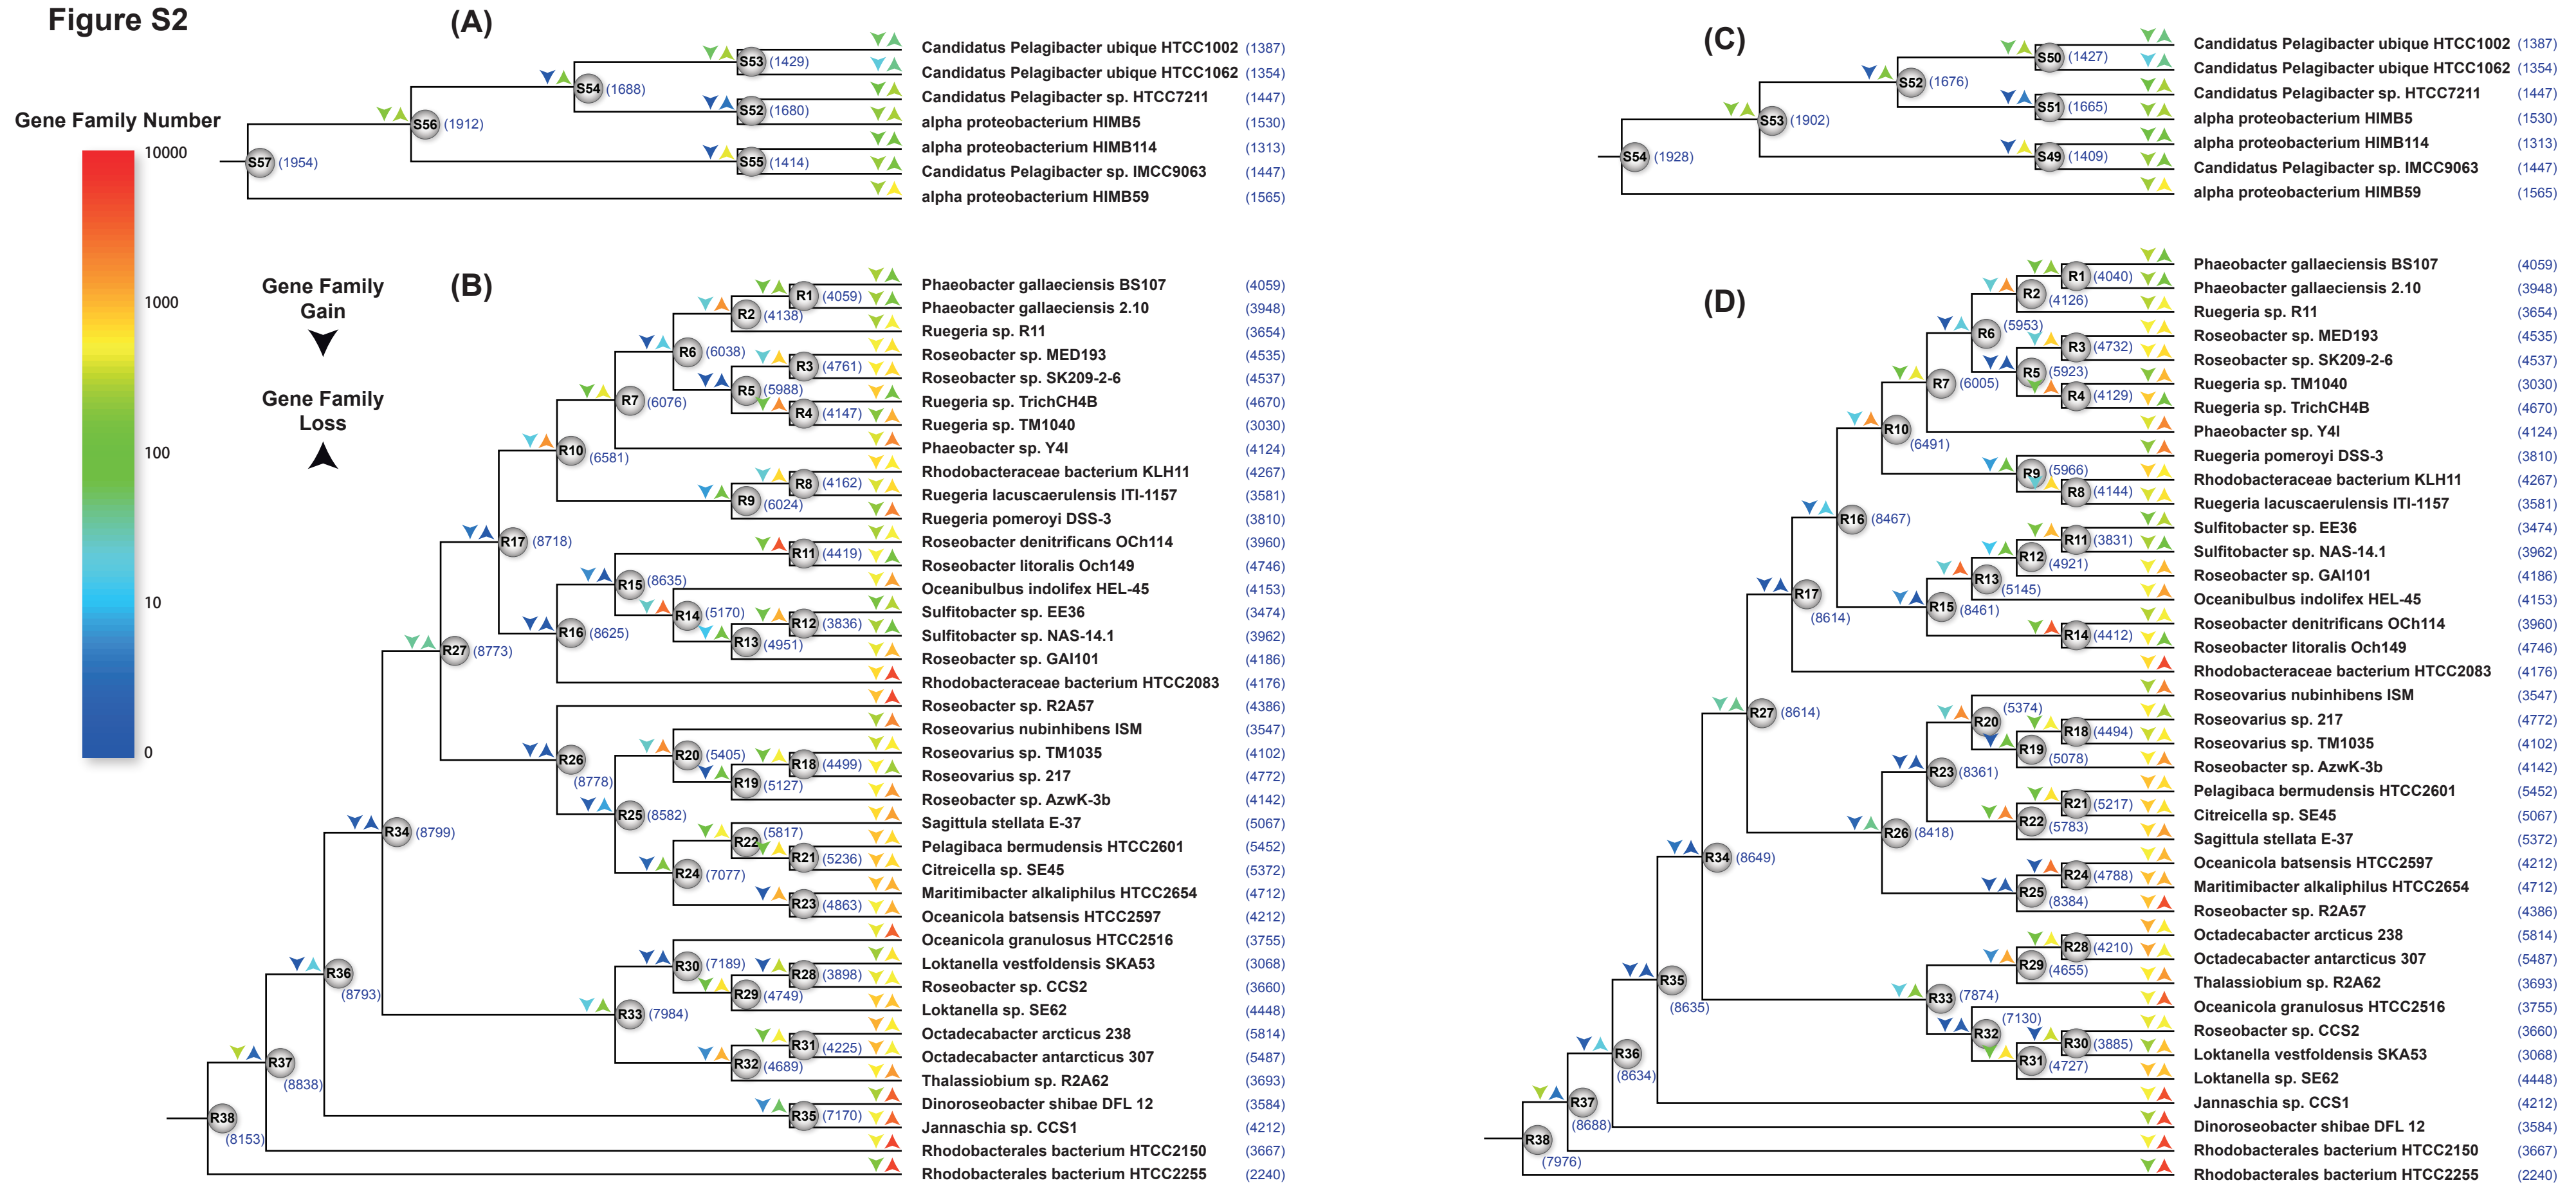

Supplement: mbo004131559sf02.pdf [file mbo004131559sf02.pdf]

Figure S3

● Ancestral branches  
● Exterior branches

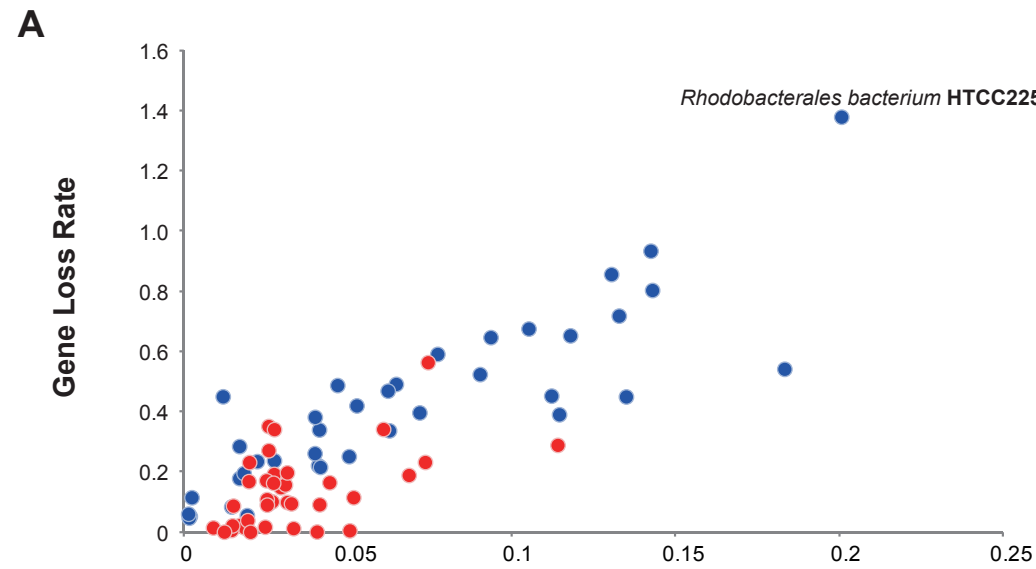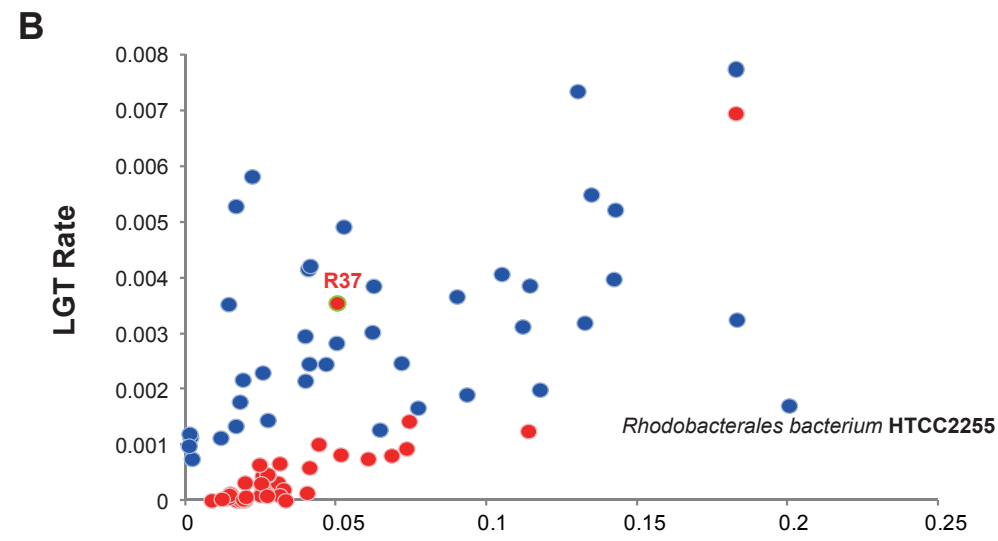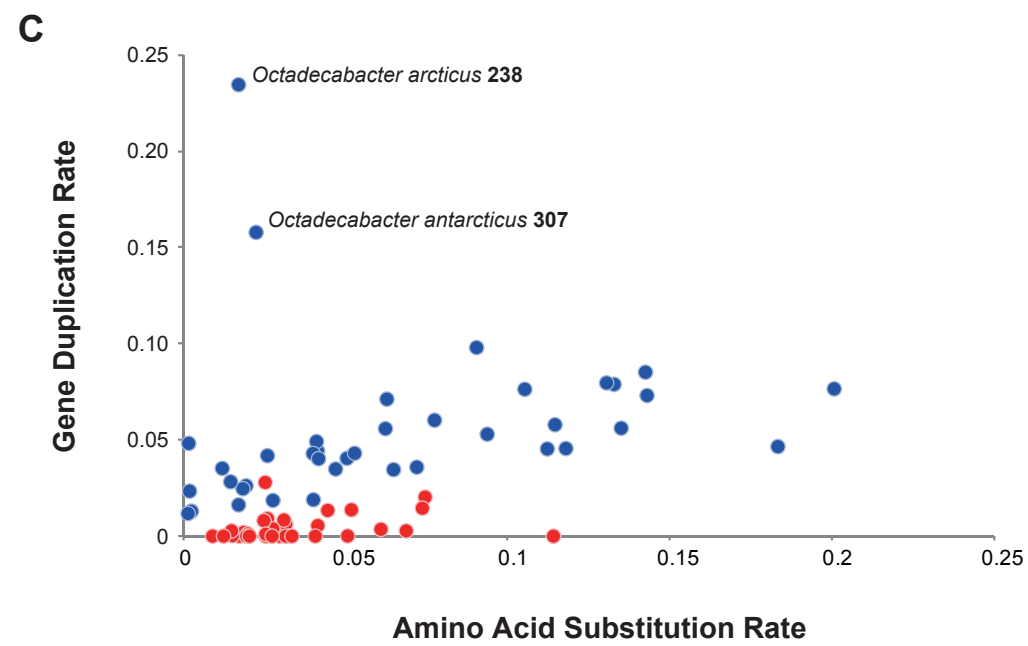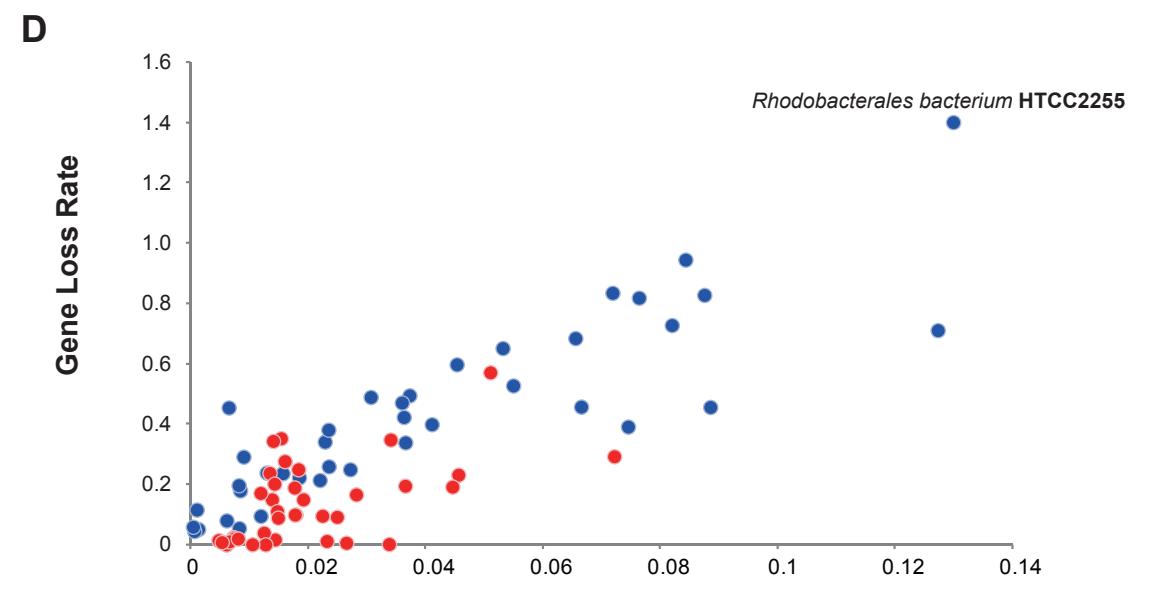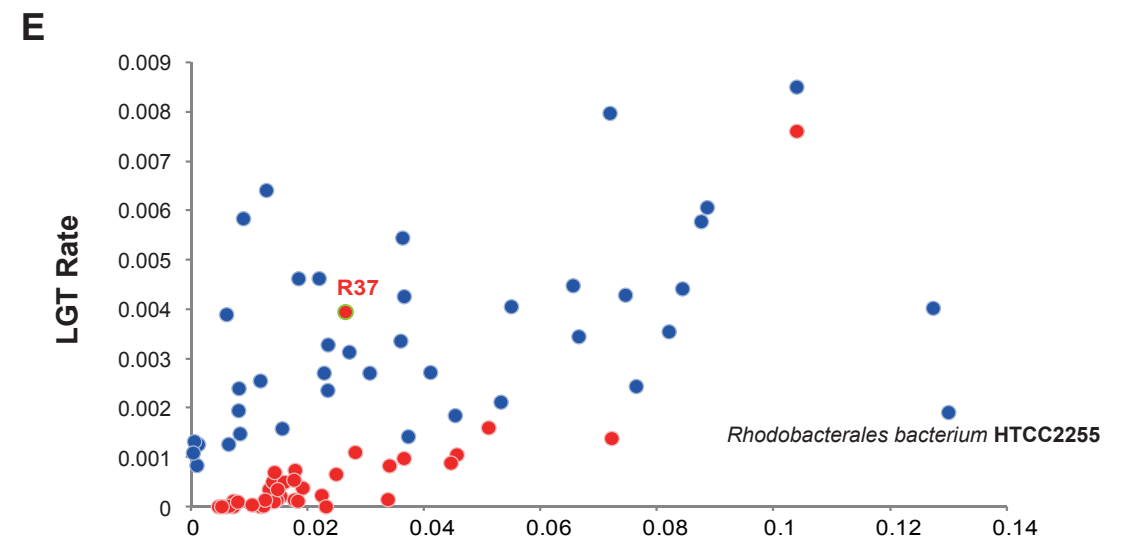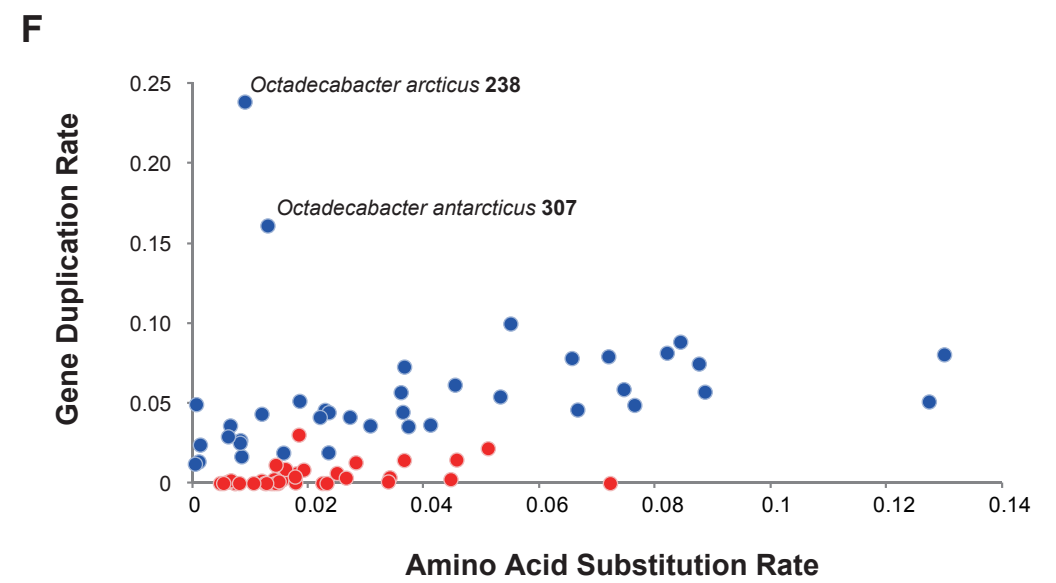

Supplement: mbo004131559sf03.pdf [file mbo004131559sf03.pdf]

# Figure S4

## A P4

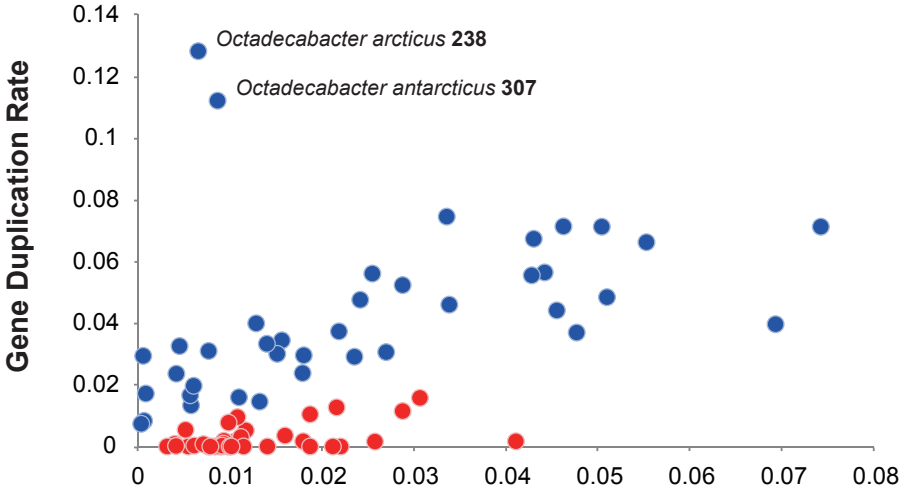

## B RAxML

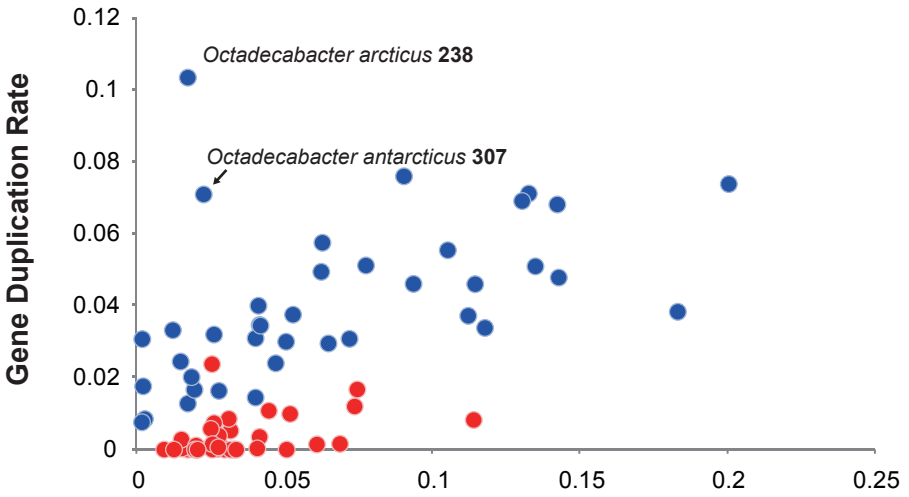

## C PhyloBayes

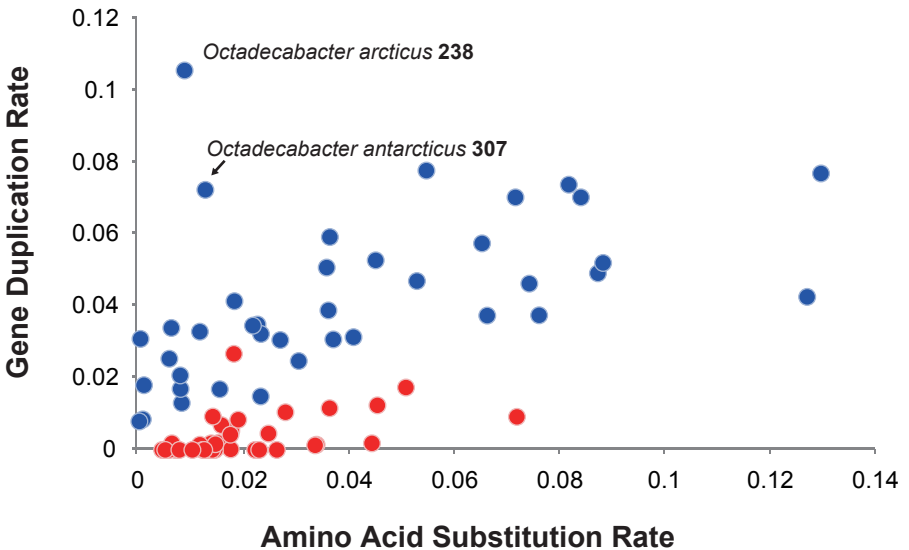

Supplement: mbo004131559sf04.pdf [file mbo004131559sf04.pdf]

Figure S5

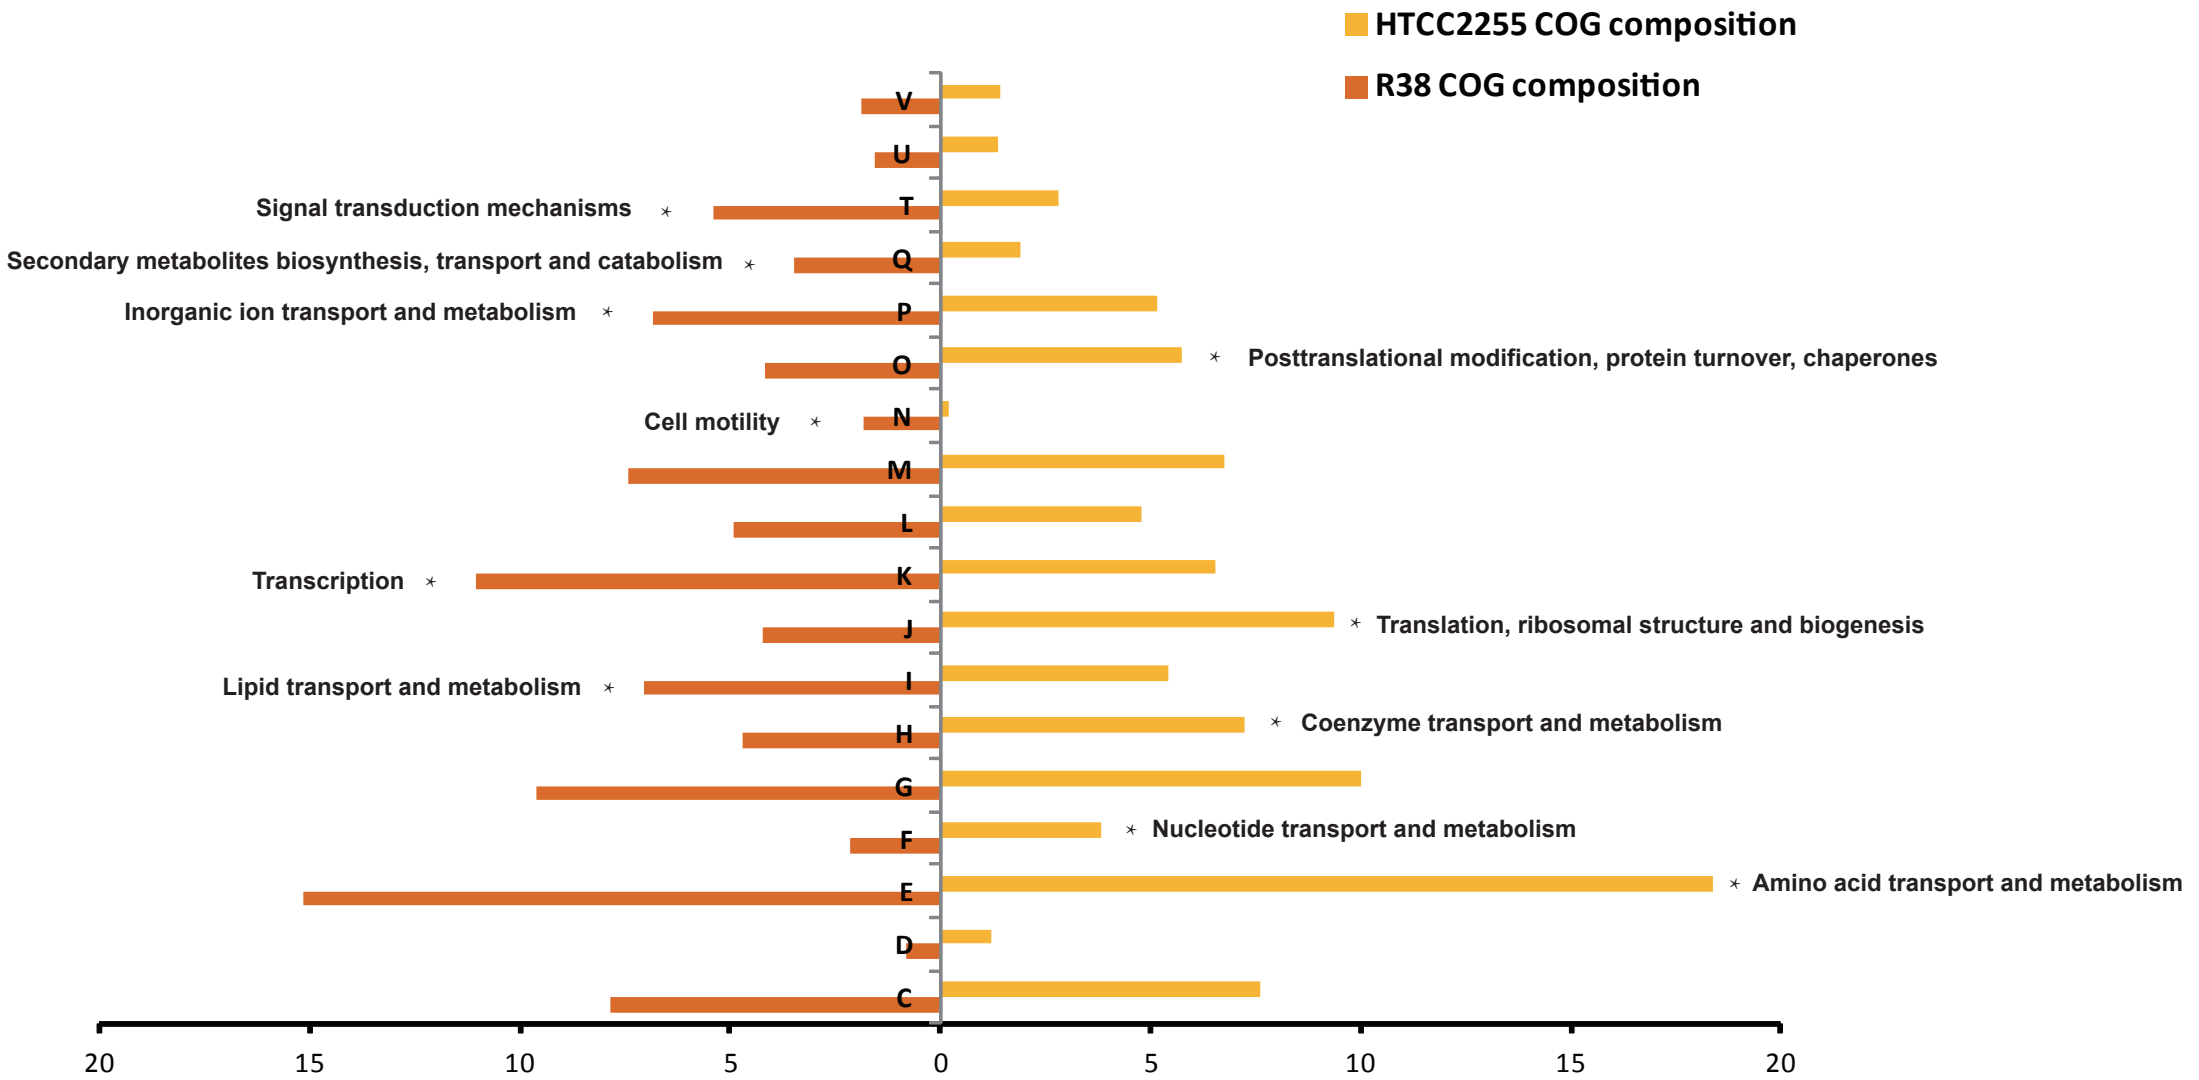

Supplement: mbo004131559sf05.pdf [file mbo004131559sf05.pdf]

Figure S6

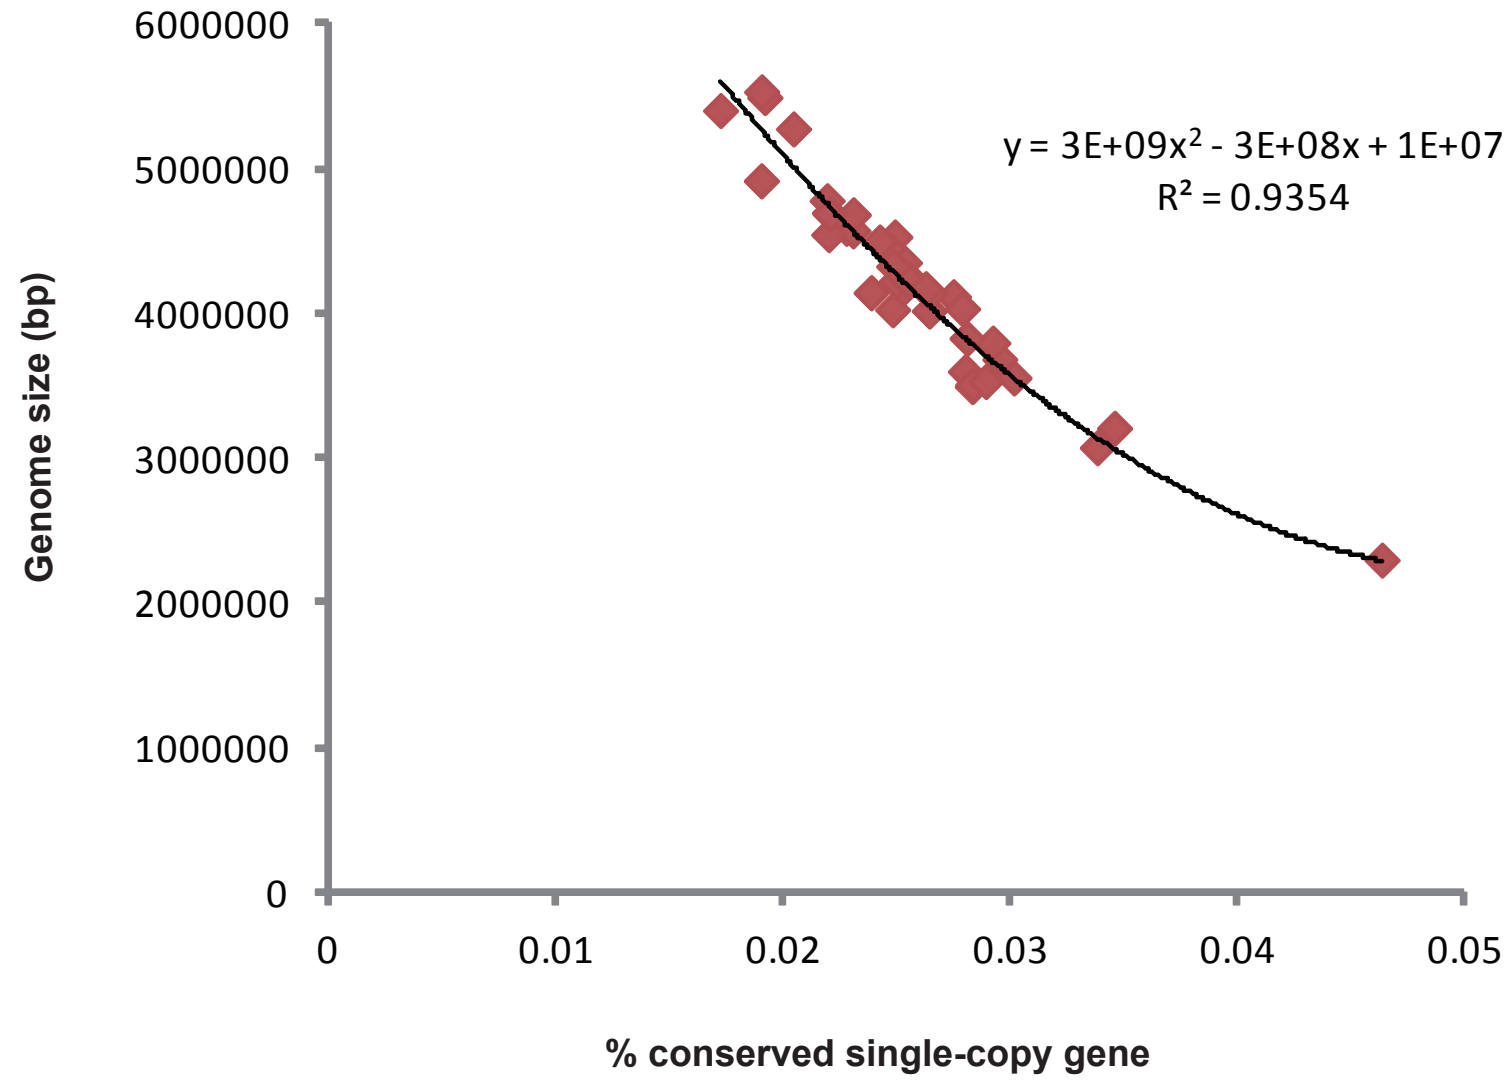

Supplement: mbo004131559sf06.pdf [file mbo004131559sf06.pdf]
